# Supplementary material
Source: publisher site journal article supplement (https://www.spandidos-publications.com/3179/downloadSupplementary)
Supplement: Supplementary file 1 [file downloadSupplementary]

## Sheet: Sheet1
Table S1. The specific data of length and width of tumors in each nude mouse
A, Day 1
Group	Individual mouse no.	a (mm)	b (mm)	V (mm3)
Control	1	2.1	1.5	2.457
	2	2.6	1.4	2.64992
	3	1.5	1.1	0.9438
Salvianolate (10 mg/kg)	1	1.9	1.6	2.52928
	2	2.2	1.5	2.574
	3	1.8	1.4	1.83456
Salvianolate (20 mg/kg)	1	2.7	1.7	4.05756
	2	1.6	0.9	0.67392
	3	1.8	1.3	1.58184
Salvianolate (50 mg/kg)	1	1.7	1.3	1.49396
	2	2.1	1.5	2.457
	3	1.9	1.4	1.93648
B, Day 4
Group	Individual mouse no.	a (mm)	b (mm)	V (mm3)
Control	1	4.8	2.7	18.1958
	2	5.2	2.1	11.9246
	3	3.1	2.4	9.28512
Salvianolate (10 mg/kg)	1	2.9	2.1	6.65028
	2	3.4	2.3	9.35272
	3	4.1	1.8	6.90768
Salvianolate (20 mg/kg)	1	3.1	2.2	7.80208
	2	2.5	1.7	3.757
	3	2.8	2.1	6.42096
Salvianolate (50 mg/kg)	1	2.4	1.8	4.04352
	2	3.3	2.1	7.56756
	3	2.5	1.8	4.212
C, Day 7
Group	Individual mouse no.	a (mm)	b (mm)	V (mm3)
Control	1	6.1	4.7	70.0695
	2	6.8	4.2	62.375
	3	5.5	2.7	20.8494
Salvianolate (10 mg/kg)	1	4.8	3.1	23.9866
	2	5.5	3.5	35.035
	3	5.2	3	24.336
Salvianolate (20 mg/kg)	1	4.2	3.6	28.3046
	2	3.4	2.6	11.9517
	3	3.9	3.2	20.7667
Salvianolate (50 mg/kg)	1	4.1	2.7	15.5423
	2	3.8	3.2	20.2342
	3	3.2	2.2	8.05376
D, Day 10
Group	Individual mouse no.	a (mm)	b (mm)	V (mm3)
Control	1	7.4	5.8	129.447
	2	8.5	5.1	114.964
	3	7.7	4.9	96.136
Salvianolate (10 mg/kg)	1	6.1	4.4	61.4099
	2	6.9	4.2	63.2923
	3	5.8	3.7	41.289
Salvianolate (20 mg/kg)	1	5.8	4.5	61.074
	2	4.2	3.8	31.537
	3	5.2	4.1	45.4542
Salvianolate (50 mg/kg)	1	5.2	3.7	37.0178
	2	4.4	3.5	28.028
	3	3.8	2.8	15.4918
E, Day 13
Group	Individual mouse no.	a (mm)	b (mm)	V (mm3)
Control	1	8.9	6.5	195.533
	2	9.4	6.2	187.895
	3	9.2	5.6	150.026
Salvianolate (10 mg/kg)	1	7.3	5.2	102.644
	2	8.1	4.8	97.0445
	3	6.9	5.1	93.3239
Salvianolate (20 mg/kg)	1	6.6	5.4	100.077
	2	5.8	4.7	66.6234
	3	6.2	4.9	77.4082
Salvianolate (50 mg/kg)	1	6.1	4.5	64.233
	2	5	4.3	48.074
	3	4.7	3.6	31.6742
F, Day 16
Group	Individual mouse no.	a (mm)	b (mm)	V (mm3)
Control	1	10.1	7.6	303.356
	2	10.8	8.3	386.886
	3	10.7	6.9	264.902
Salvianolate (10 mg/kg)	1	9.1	7.1	238.54
	2	9.5	6.7	221.757
	3	8.4	6.8	201.976
Salvianolate (20 mg/kg)	1	8.7	6.6	197.065
	2	7.6	5.9	137.569
	3	8.5	5.4	128.887
Salvianolate (50 mg/kg)	1	6.8	4.9	84.8994
	2	6.2	5.1	83.8562
	3	5.9	4.7	67.7721
a, long diameter; b, short diameter; V, volume
